# Supplementary material for: Facile synthesis of a Co3V2O8interconnected hollow microsphere anode with superior high-rate capability for Li-ion batteries
Source: Royal Society of Chemistry journal article supplement (doi:10.1039/c6ta01339b), 2016-01-01
Supplement: c6ta01339b1.pdf [file c6ta01339b1.pdf]

## Supporting Information for

### **Facile synthesis of $\text{Co}_3\text{V}_2\text{O}_8$ interconnected hollow microsphere anode with superior high-rate capability for Li- ion battery**

Yanzhu Luo,<sup>a,b</sup> Xu Xu,<sup>a,c</sup> Xiaocong Tian,<sup>a</sup> Qiulong Wei,<sup>a</sup> Mengyu Yan,<sup>a</sup> Kangning  
Zhao,<sup>a</sup> Xiaoming Xu,<sup>a</sup> and Liqiang Mai<sup>a,\*</sup>

<sup>a</sup> State Key Laboratory of Advanced Technology for Materials Synthesis and  
Processing, Wuhan University of Technology, Wuhan 430070, P. R. China. E-mail:  
mlq518@whut.edu.cn.

<sup>b</sup> Department of Chemical and Biomolecular Engineering, University of California,  
Los Angeles, California 90095, United States

<sup>c</sup> Department of Chemistry and Biochemistry, University of California, Los Angeles,  
California 90095, United States

## Supplementary Figures

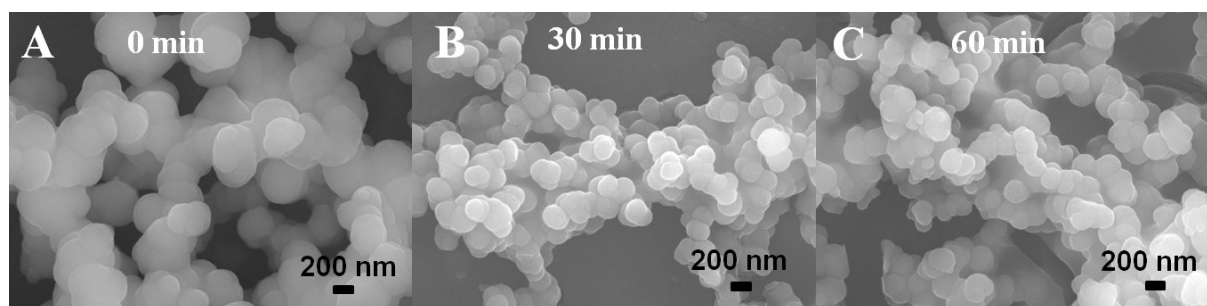

**Fig. S1** Typical SEM images of the precursor particles obtained in solutions at step A.

(A) 0 min; (B) 30 min; (C) 60 min.

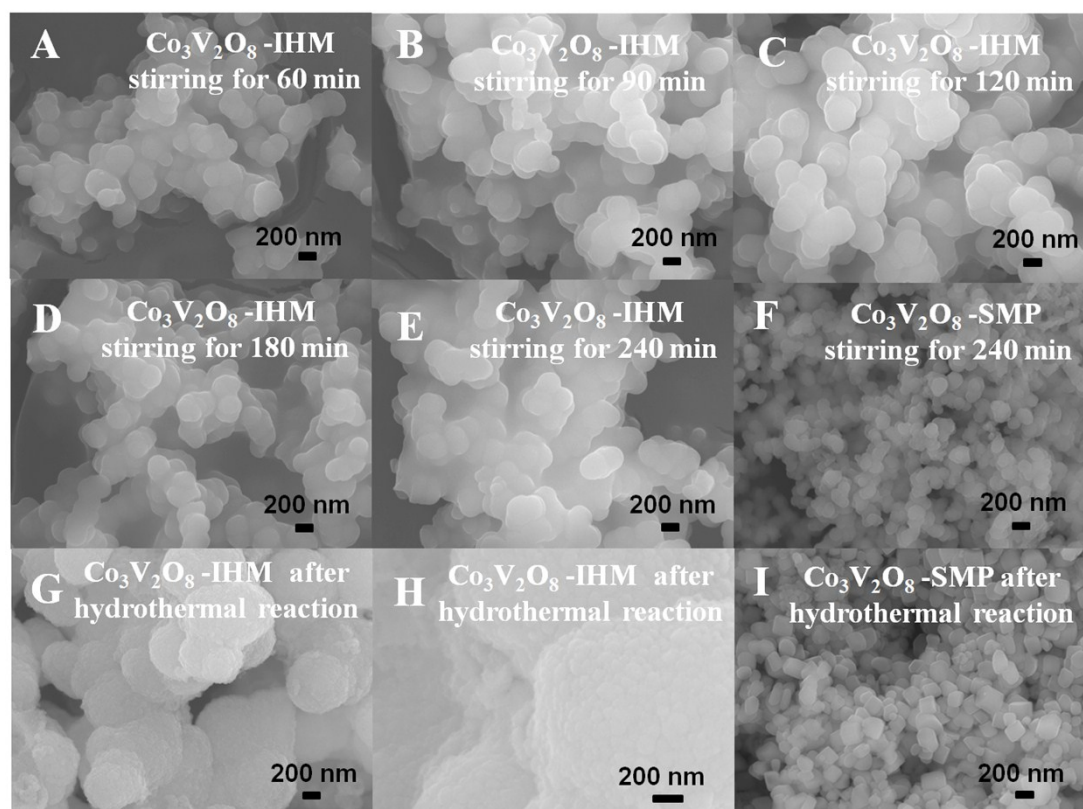

**Fig. S2** Typical SEM images of the precursor particles obtained in solutions at step B

(A-F).  $\text{Co}_3\text{V}_2\text{O}_8$ -IHM precursor particles: (A) 60 min; (B) 90 min; (C) 120 min; (D) 180 min; (E) 240 min.  $\text{Co}_3\text{V}_2\text{O}_8$ -SMP precursor particles: (F) 240 min. Typical SEM images of the  $\text{Co}_3\text{V}_2\text{O}_8$ -IHM (G, H) and  $\text{Co}_3\text{V}_2\text{O}_8$ -SMP (I) precursor particles obtained in solutions after step C.

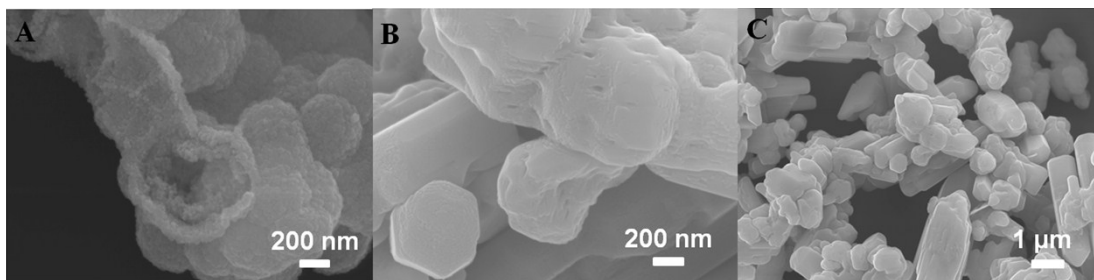

**Fig. S3** Typical SEM images of Co<sub>3</sub>V<sub>2</sub>O<sub>8</sub>-IHM (A) and Co<sub>3</sub>V<sub>2</sub>O<sub>8</sub>-SMP (B, C).

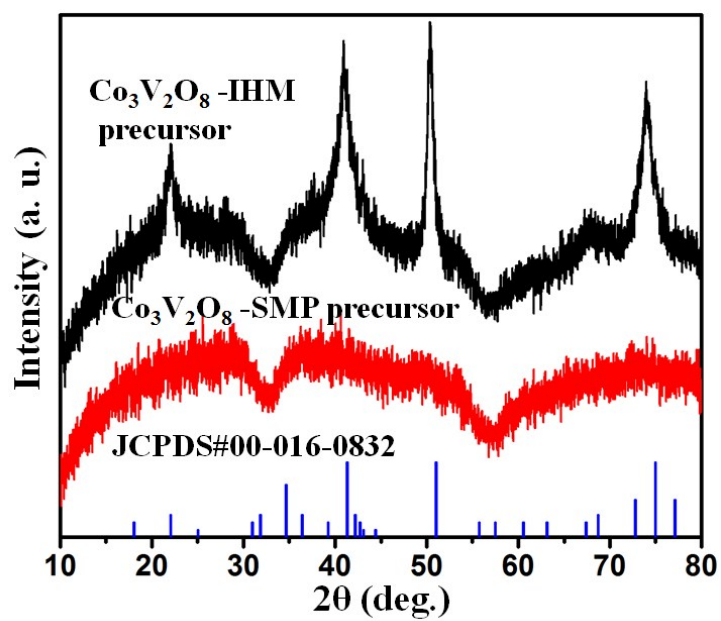

**Fig. S4** XRD patterns of as-prepared precursor particles after hydrothermal reaction (step C).

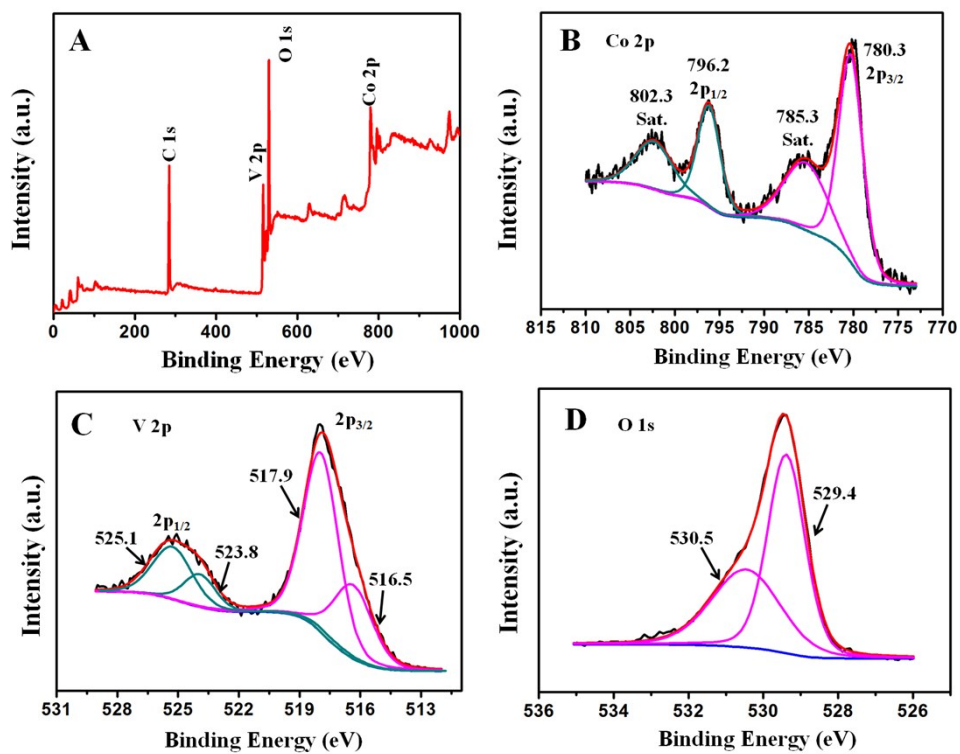

**Fig. S5** XPS spectra of the  $\text{Co}_3\text{V}_2\text{O}_8\text{-IHM}$ .

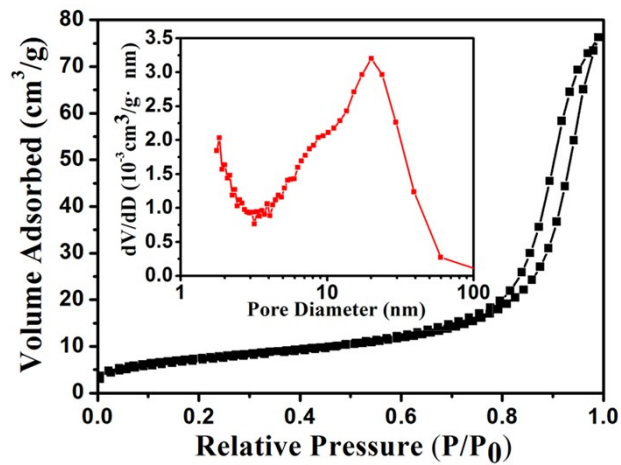

**Fig. S6** The  $\text{N}_2$  adsorption-desorption isotherms of  $\text{Co}_3\text{V}_2\text{O}_8\text{-IHM}$ . The insets show the corresponding BJH pore size distribution curves.

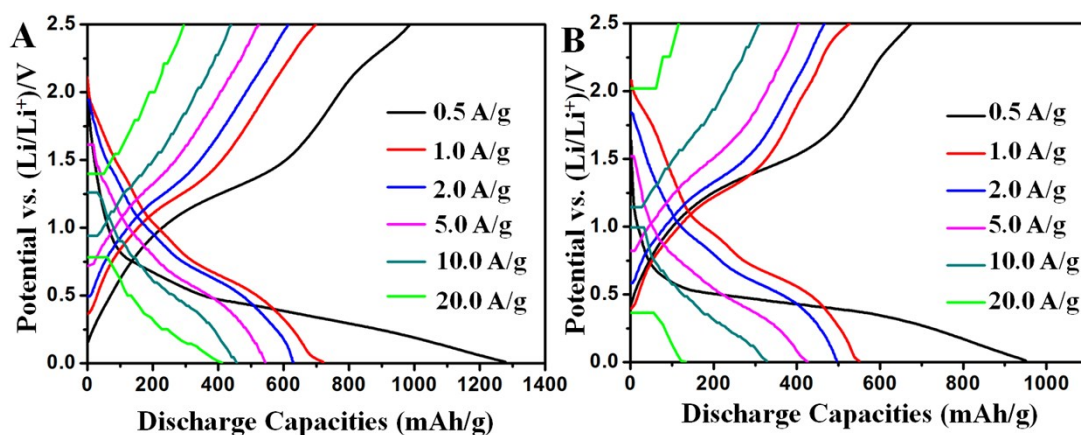

**Fig. S7** The corresponding first cycle voltage capacity profiles of  $\text{Co}_3\text{V}_2\text{O}_8\text{-IHM}$  (A) and  $\text{Co}_3\text{V}_2\text{O}_8\text{-SMP}$  (B) at different current densities during rate performance test.

**Table S1** The data of EIS test of  $\text{Co}_3\text{V}_2\text{O}_8\text{-IHM}$  after different cycles.

| Cycle Numbers         | Before Cycle | 5 <sup>th</sup> | 10 <sup>th</sup> | 20 <sup>th</sup> | 50 <sup>th</sup> |
|-----------------------|--------------|-----------------|------------------|------------------|------------------|
| $R_c$ ( $\Omega$ )    | 4.1          | 5.9             | 4.9              | 8.5              | 9.5              |
| $R_f$ ( $\Omega$ )    | –            | 0.1             | 0.45             | 1.2              | 1.4              |
| $R_{ct}$ ( $\Omega$ ) | 30.1         | 8.1             | 9.2              | 8.4              | 8.6              |
